# Supplementary material for: Physical–chemical characterization of novel cationic transfection lipids and the binding of model DNA at the air–water interface
Source: Royal Society of Chemistry journal article supplement (doi:10.1039/c1sm06124k), 2011-01-01
Supplement: c1sm06124k.pdf [file c1sm06124k.pdf]

## Supporting Information

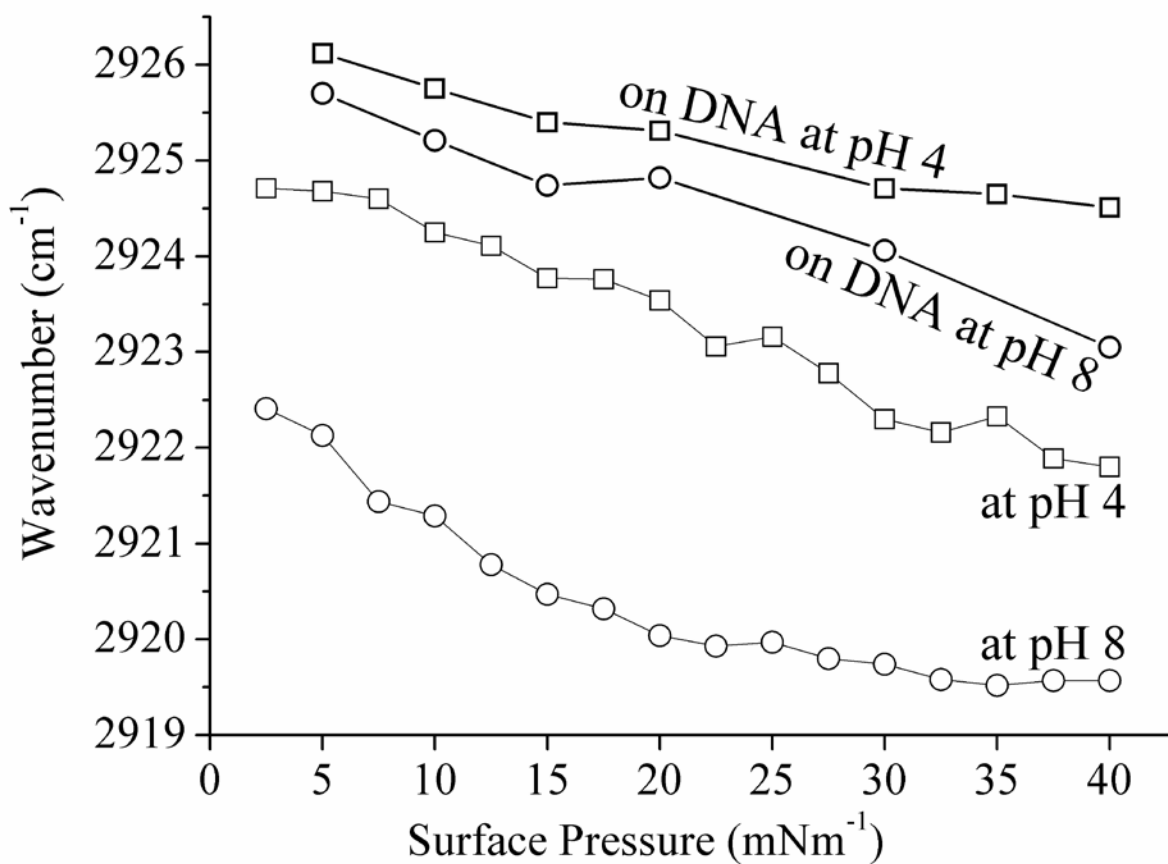

**Figure 13.** Position of the asymmetric CH<sub>2</sub>-stretching vibration of lipid **8** on different subphases at 20°C in dependence of the surface pressure.

## Quantification of ctDNA with IRRAS

**Table 3.** Area per molecule  $A$  and integrated reflectance absorbance of the phosphate bands of DNA (relative amount of DNA  $n_{rel}$ ) in dependence of the surface pressure  $\pi$  of lipid **7** and lipid **8** on DNA subphases at different pH values at 20°C.  $n_{rel}$  is the average of two independent measurements.

| $\pi$<br>(mNm <sup>-1</sup> ) | $A$<br>(Å <sup>2</sup> ) | $n_{rel}$<br>(a.u.)    | $A$<br>(Å <sup>2</sup> ) | $n_{rel}$<br>(a.u.) |
|-------------------------------|--------------------------|------------------------|--------------------------|---------------------|
| <b>lipid 7 on pH 4</b>        |                          | <b>lipid 8 on pH 4</b> |                          |                     |
| 5                             | 141                      | 1.01                   | 140                      | 1.18                |
| 10                            | 112                      | 1.59                   | 118                      | 1.52                |
| 15                            | 91                       | 2.01                   | 106                      | 1.89                |
| 20                            | 79                       | 2.40                   | 97                       | 1.98                |
| 30                            | 68                       | 2.78                   | 84                       | 2.31                |
| 40                            | 62                       | 2.99                   | -                        | -                   |
| <b>lipid 7 on pH 8</b>        |                          | <b>lipid 8 on pH 8</b> |                          |                     |
| 5                             | 120                      | 0.84                   | 117                      | 0.93                |
| 10                            | 104                      | 1.17                   | 104                      | 1.18                |
| 15                            | 89                       | 1.32                   | 94                       | 1.16                |
| 20                            | 74                       | 1.61                   | 85                       | 1.27                |
| 30                            | 60                       | 1.88                   | 72                       | 1.57                |
| 40                            | 53                       | 2.01                   | 61                       | 1.78                |

### Interaxial spacing of DNA strands

**Table 4.** Area per molecule  $A$  and interaxial repeat distance  $d_{DNA}$  of DNA strands in dependence of the surface pressure  $\pi$  of lipid **7** and lipid **8** on DNA subphases at different pH values at 20°C.

| $\pi$<br>(mNm <sup>-1</sup> ) | $A$<br>(Å <sup>2</sup> ) | $d_{DNA}$<br>(Å)    | $A$<br>(Å <sup>2</sup> ) | $d_{DNA}$<br>(Å) |
|-------------------------------|--------------------------|---------------------|--------------------------|------------------|
|                               | <b>lipid 7 on pH 4</b>   |                     | <b>lipid 8 on pH 4</b>   |                  |
| 10                            | 112                      | 49.4 <sup>(1)</sup> | 118                      | 50.7             |
| 15                            | 91                       | 31.0                | 106                      | 43.6             |
| 20                            | 79                       | 30.0                | 97                       | 35.9             |
| 25                            | –                        | –                   | 90                       | 33.7             |
| 30                            | 68                       | 27.3                | 84                       | 31.9             |
| 37                            | 63                       | 26.6                | 73                       | 30.2             |
|                               | <b>lipid 7 on pH 8</b>   |                     | <b>lipid 8 on pH 8</b>   |                  |
| 5                             | –                        | –                   | 117                      | 53.2             |
| 10                            | 104                      | 26.8                | 104                      | 48.3             |
| 15                            | 89                       | 26.8                | 94                       | 40.9             |
| 20                            | 74                       | 26.2                | 85                       | 31.9             |
| 25                            | 66                       | 25.6                | –                        | –                |
| 30                            | 60                       | 26.0                | 72                       | 28.8             |
| 40                            | 53                       | 24.8                | 61                       | 27.4             |

<sup>(1)</sup> low intensity,  $d_{DNA}$  obtained without Lorentzian fit
